# Supplementary material for: Isolevuglandins disrupt PU.1-mediated C1q expression and promote autoimmunity and hypertension in systemic lupus erythematosus
Source: PubMed Central journal article supplement (PMC9310530; doi:10.1172/jci.insight.136678), 2022-07-08
Supplement: jciinsight-7-136678-s245.pdf [file jciinsight-7-136678-s245.pdf]

## Supplemental Information

### Isolevuglandins disrupt PU.1 mediated C1q expression and promote autoimmunity and hypertension in systemic lupus erythematosus

**Authors:** David M. Patrick<sup>1,2,3</sup>, Néstor de la Visitación<sup>2,4</sup>, Jaya Krishnan<sup>2</sup>, Wei Chen<sup>2</sup>, Michelle J. Ormseth<sup>3,5</sup>, C. Michael Stein<sup>2,5</sup>, Sean S. Davies<sup>2</sup>, Venkataraman Amarnath<sup>2</sup>, Leslie J. Crofford<sup>5</sup>, Jonathan M. Williams<sup>5</sup>, Shilin Zhao<sup>6</sup>, Charles D. Smart<sup>2,7</sup>, Sergey Dikalov<sup>2</sup>, Anna Dikalova<sup>2</sup>, Liang Xiao<sup>2</sup>, Justin P. Van Beusecum<sup>2,8,9</sup>, Mingfang Ao<sup>2</sup>, Agnes B. Fogo<sup>10</sup>, Annet Kirabo<sup>2</sup>, David G. Harrison<sup>2,3,\*</sup>

**Affiliations:** <sup>1</sup> Department of Veterans Affairs, Nashville, Tennessee. <sup>2</sup> Division of Clinical Pharmacology, Department of Medicine, Vanderbilt University Medical Center, Nashville, Tennessee, USA. <sup>3</sup> Division of Cardiovascular Medicine, Department of Medicine, Vanderbilt University Medical Center. <sup>4</sup> Department of Pharmacology, University of Granada, Granada, Spain. <sup>5</sup> Division of Rheumatology and Immunology, Department of Medicine, Vanderbilt University Medical Center. <sup>6</sup> Vanderbilt Center for Quantitative Sciences, Vanderbilt University Medical Center. <sup>7</sup> Department of Molecular Physiology and Biophysics. <sup>8</sup> Department of Veterans Affairs, Charleston South Carolina. <sup>9</sup> Division of Nephrology, Medical University of South Carolina, Charleston, South Carolina. <sup>10</sup> Department of Pathology, Microbiology and Immunology, Vanderbilt University Medical Center.

**Conflicts of Interest:** DMP and DGH have a patent pending for the use of isoLG scavengers to treat SLE.

**\*Address for correspondence:**

David G. Harrison, MD  
220 Pierce Avenue  
Room 536 Robinson Research Building  
Vanderbilt University  
Nashville, TN 37232-6602  
Telephone: 615-322-3304/ Fax: 615-875-3297  
e-mail: [David.g.harrison@vumc.org](mailto:David.g.harrison@vumc.org)

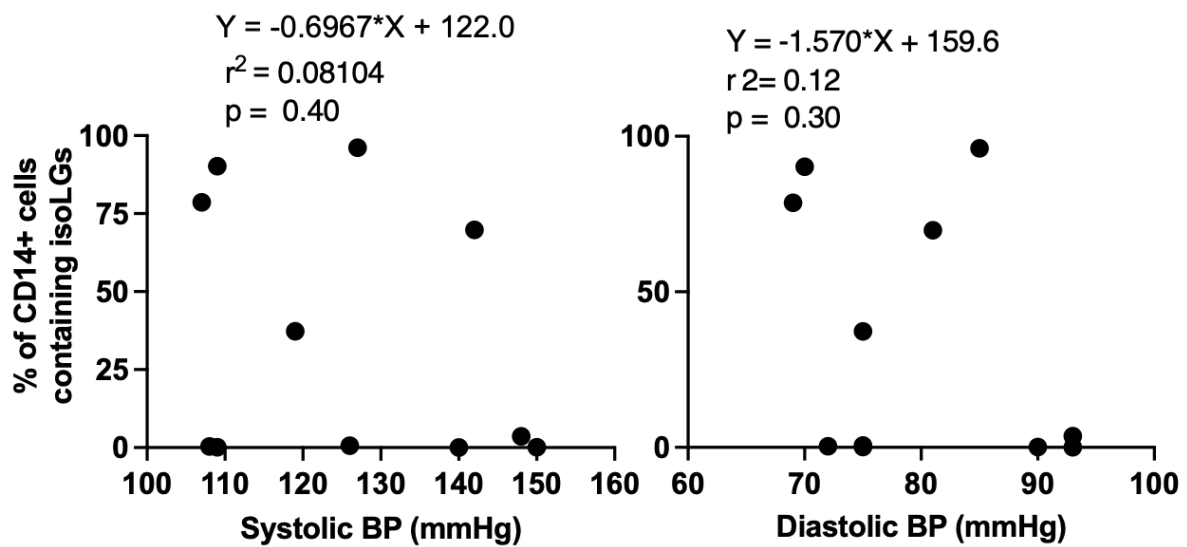

**Supplemental Figure 1:** Percent of CD14+ monocytes containing isoLG-adducts among subjects with SLE. Demographics of these subjects are presented in Supplemental Table 1.

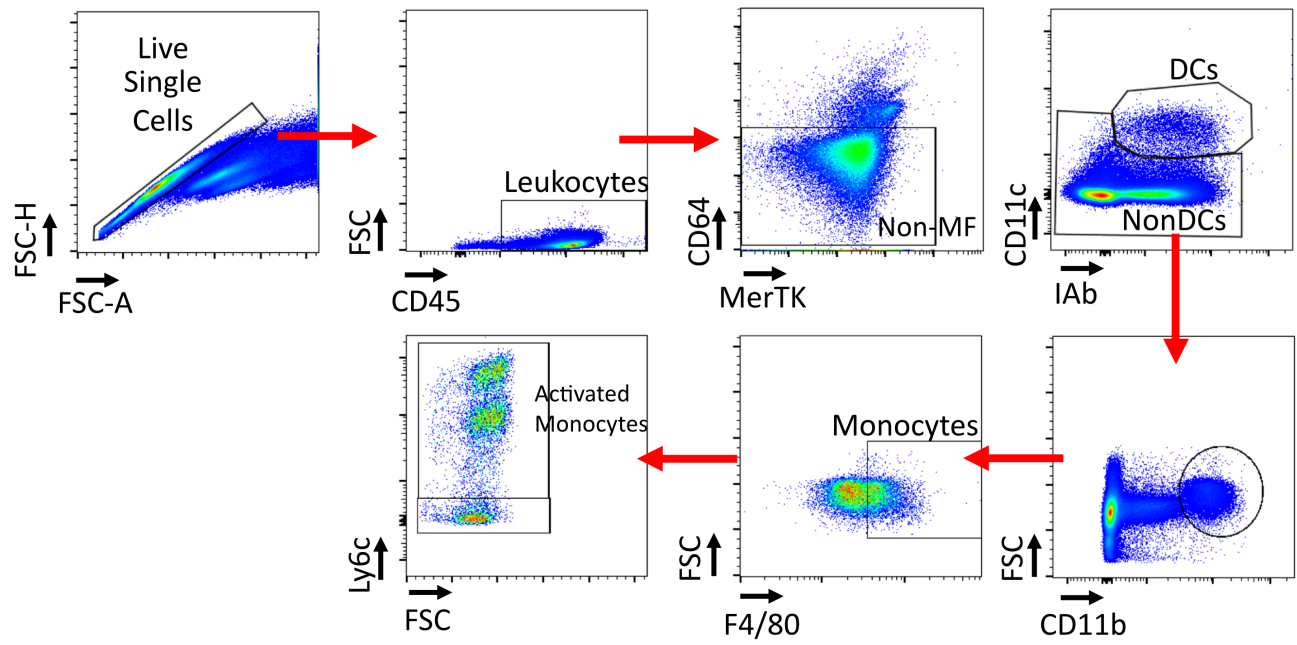

**Supplemental Figure 2:** Gating strategy for dendritic cells and monocytes.

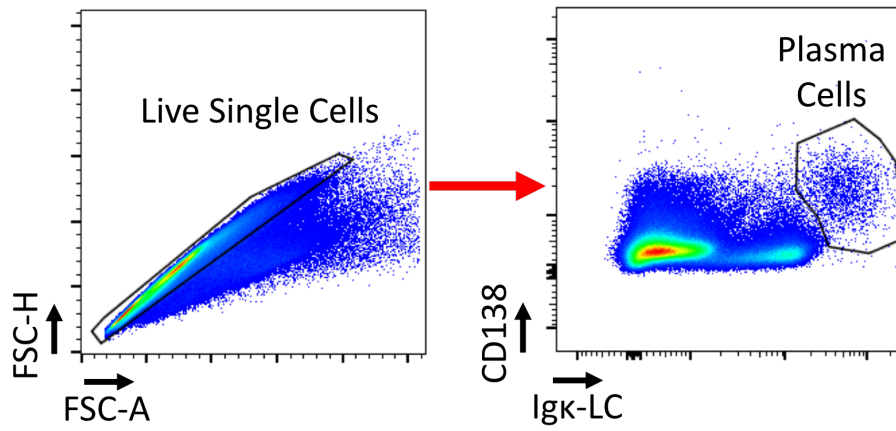

**Supplemental Figure 3:** Gating strategy for plasma cells.

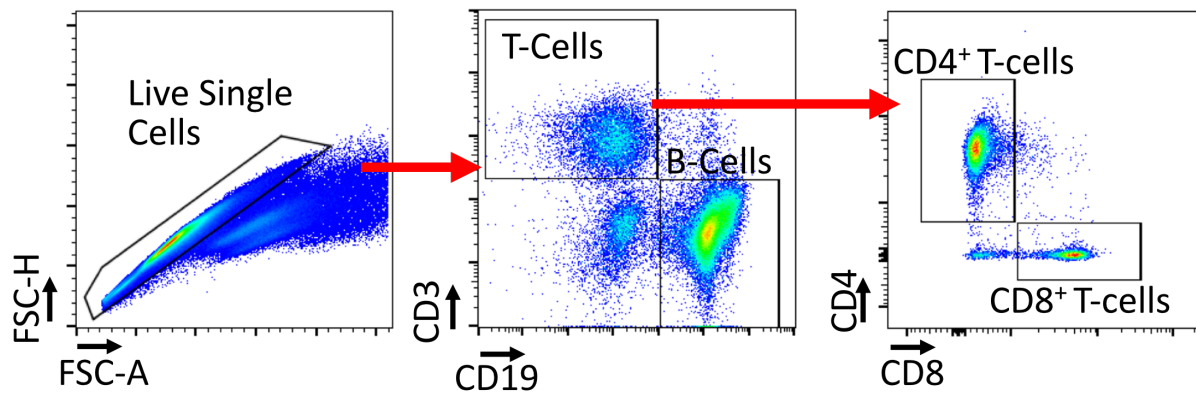

**Supplemental Figure 4:** Gating strategy for B-cells and T-cells.

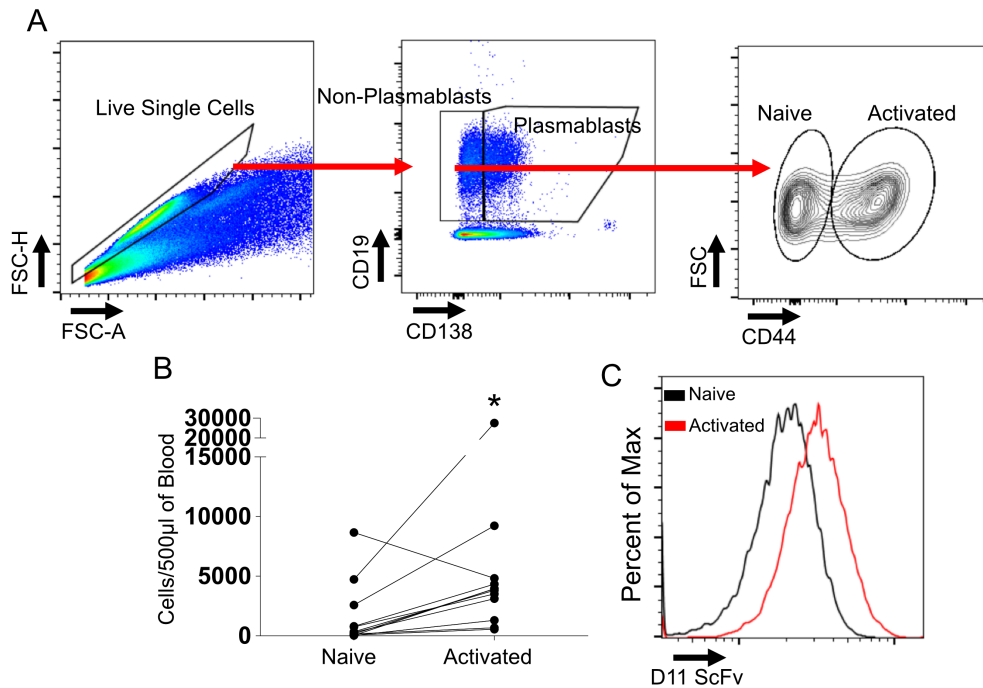

**Supplemental Figure 5:** IsoLG-adducts are enriched in peripheral activated B cells of SLE prone mice. Cells were isolated at the time of sacrifice from 32-week old *B6.SLE123* mice. Activated B cells (CD44<sup>hi</sup>) in peripheral blood exhibit augmented isoLG adduct accumulation compared to naive B cells. **(A)** Gating strategy to define activated vs naive B cells. Gating was performed on non-plasmablast B cells. **(B)** IsoLG-adduct containing cells in peripheral blood of *B6.SLE123*. Data were analyzed with a paired T-test ( $n = 12$ ,  $*P < 0.05$ ) **(C)** Representative histograms of isoLG adduct levels in activated vs naive B cells.

=

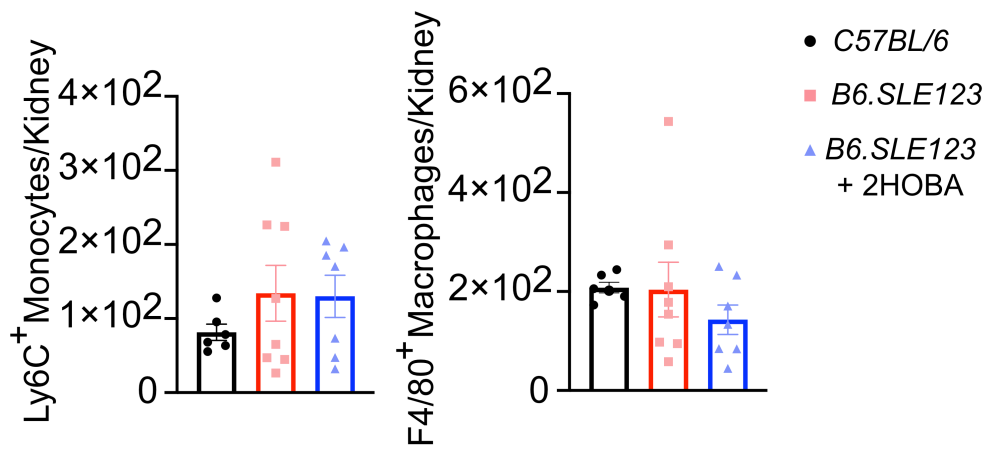

**Supplemental Figure 6:** Renal Infiltrating Ly6C<sup>+</sup> monocytes and F4/80<sup>+</sup> macrophages are unchanged by SLE or 2HOBA treatment. Cells were isolated at the time of sacrifice from 32-week old *B6.SLE123* mice and examined by flow cytometry. Data were analyzed using 1-way ANOVA ( $n = 6-8$ ).

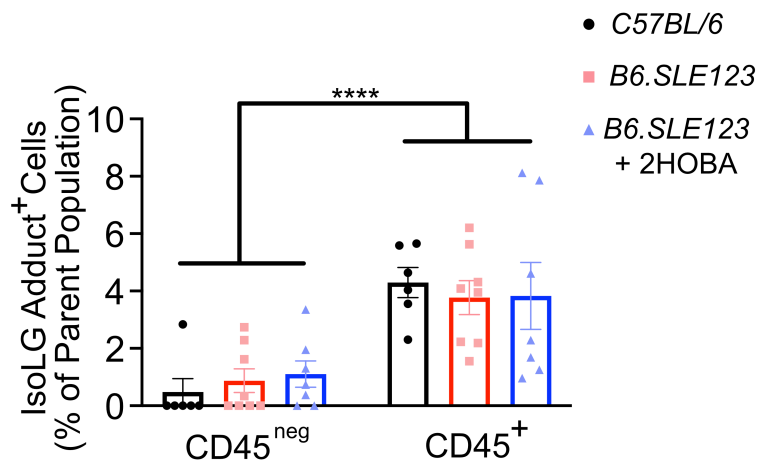

**Supplemental Figure 7: Renal Infiltrating CD45<sup>+</sup> cells exhibit augmented isoLG-adducts compared to CD45<sup>neg</sup> cells.** Cells were isolated at the time of sacrifice from 32-week old *B6.SLE123* mice and examined by flow cytometry. Data were analyzed using 2-way ANOVA ( $n = 6-8$ , \*\*\*\*  $P < 0.0001$ ).



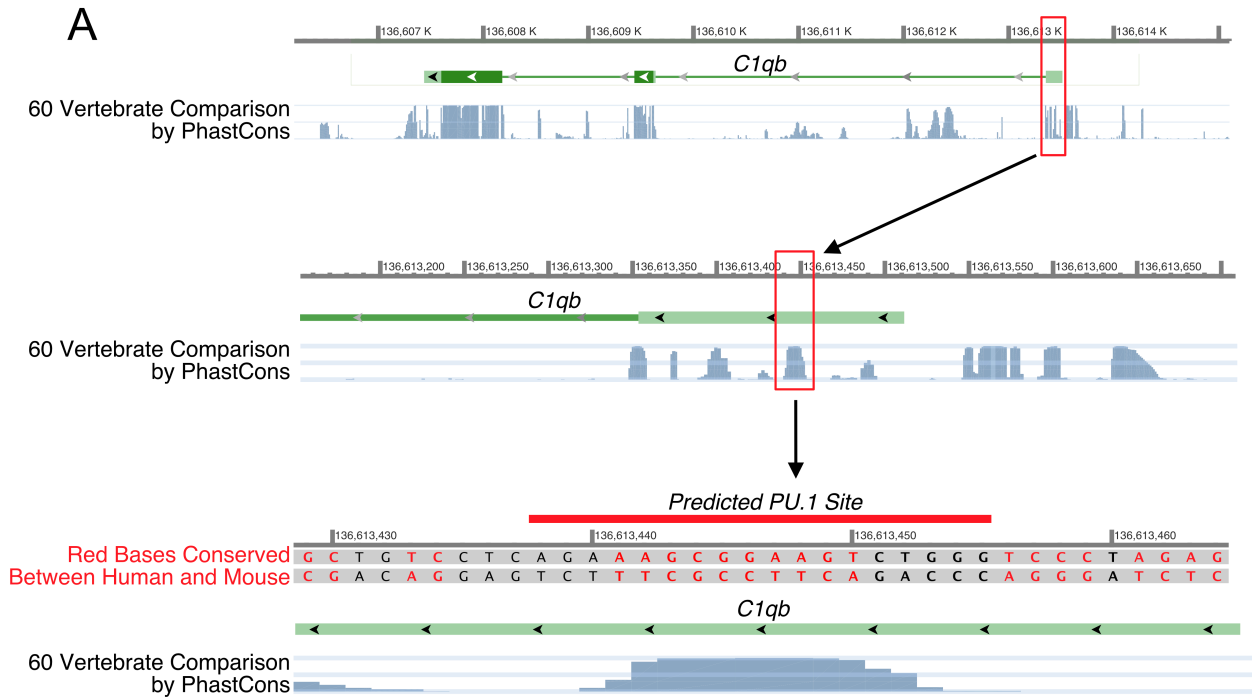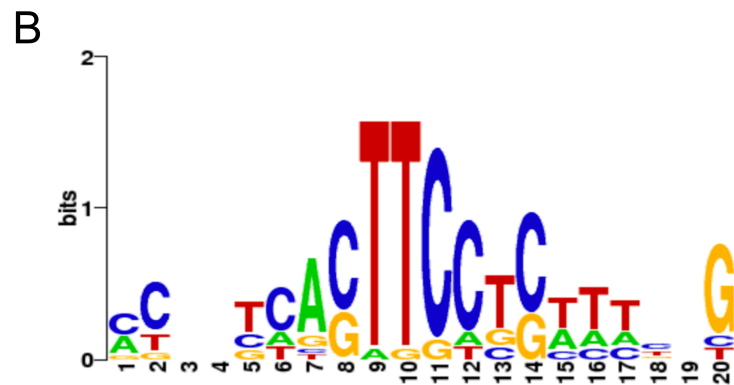

**Supplemental Figure 8: C1q PU.1 consensus site is highly conserved across vertebrates. (A)** Images from NCBI genome browser highlighting the C1q core promoter within the 5'UTR of the C1qb locus on mouse chromosome 4. Red boxes highlight subsequently magnified sequences. Red nucleotides are conserved between mouse and human. **(B)** PU.1 consensus site.

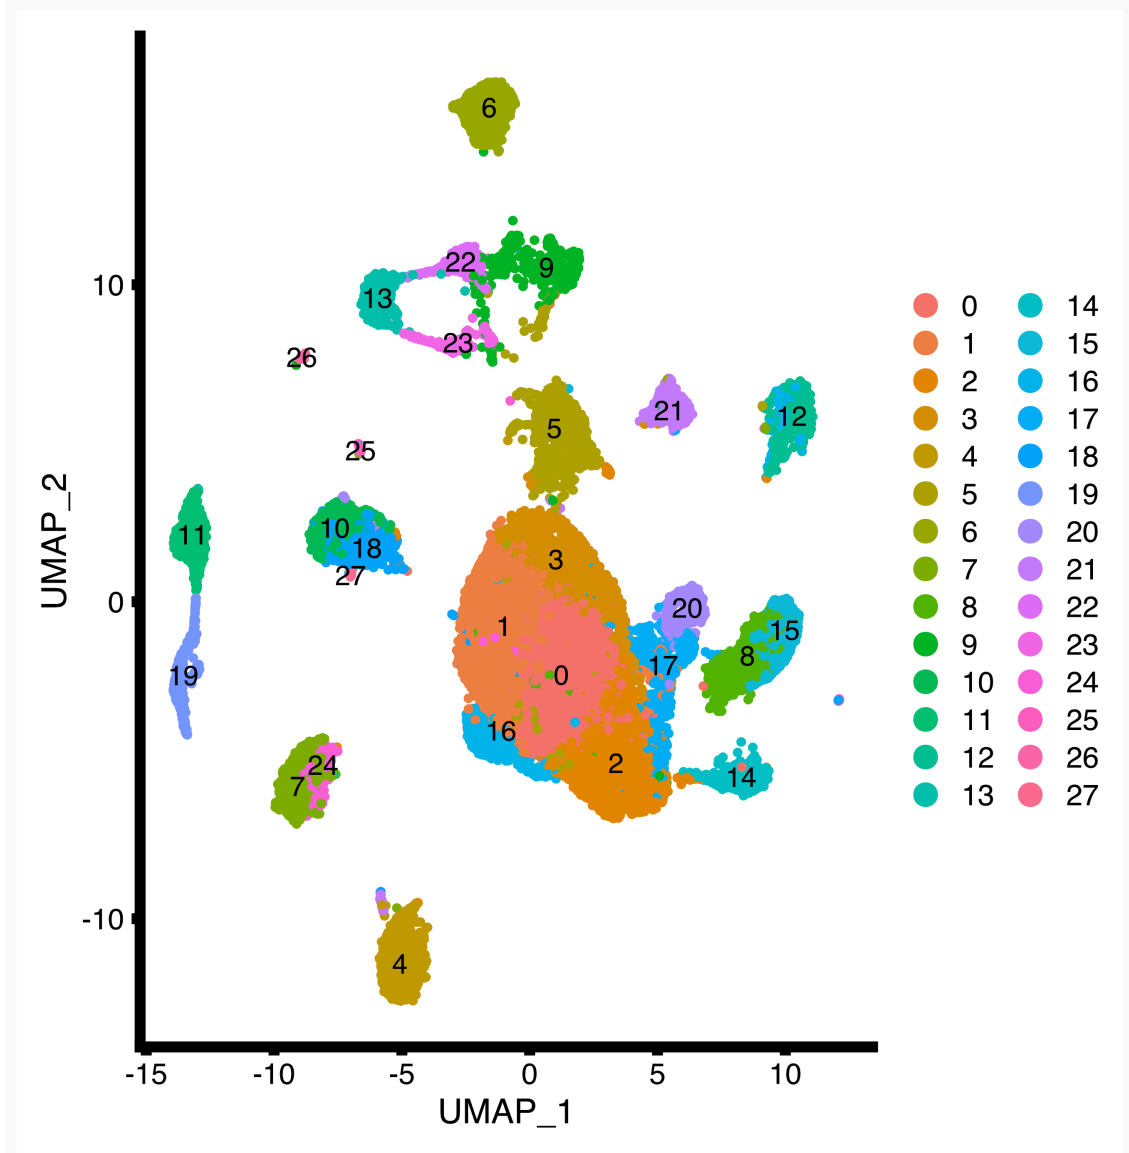

**Supplemental Figure 9:** UMAP of initial clustering of splenocytes. 26 clusters were identified.

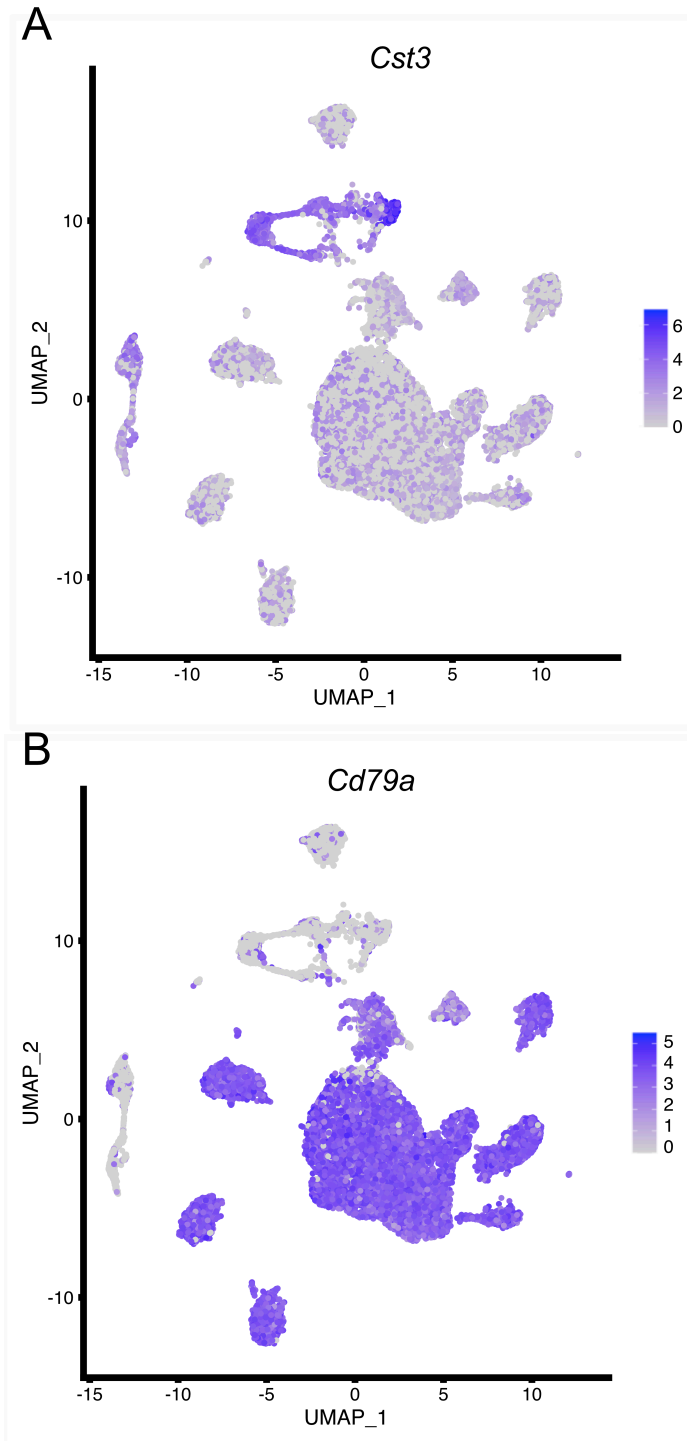

**Supplemental Figure 10:** Expression of *Cst3* and *Cd79a* on UMAP of initial clustering of splenocytes.

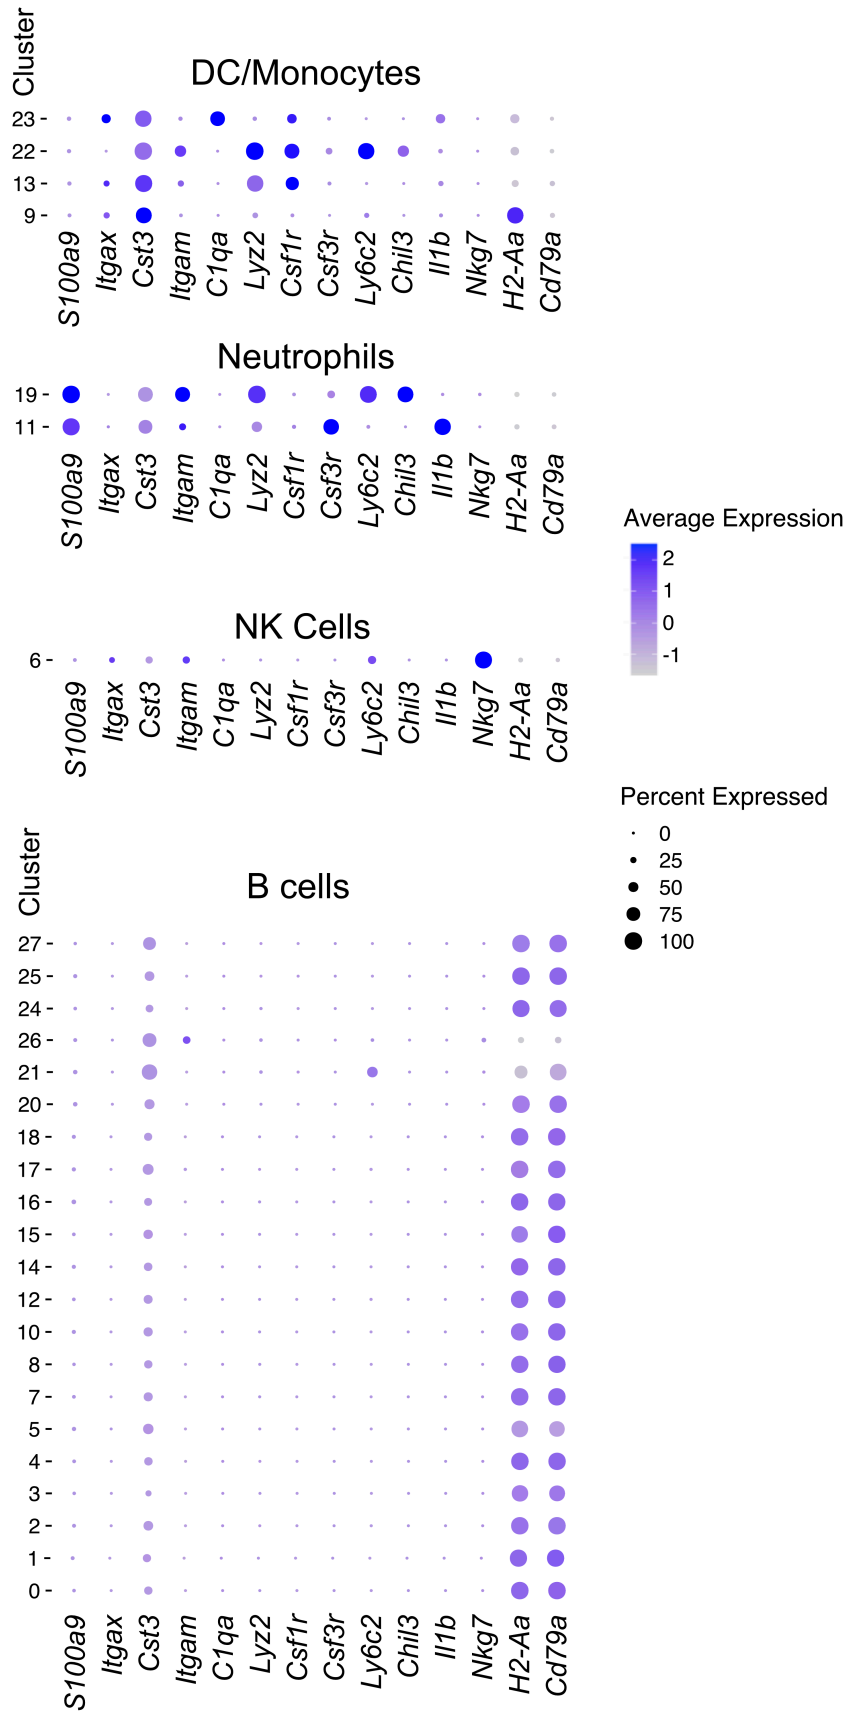

**Supplemental Figure 11:** Expression of cell-type specific genes in initial splenocyte clusters.

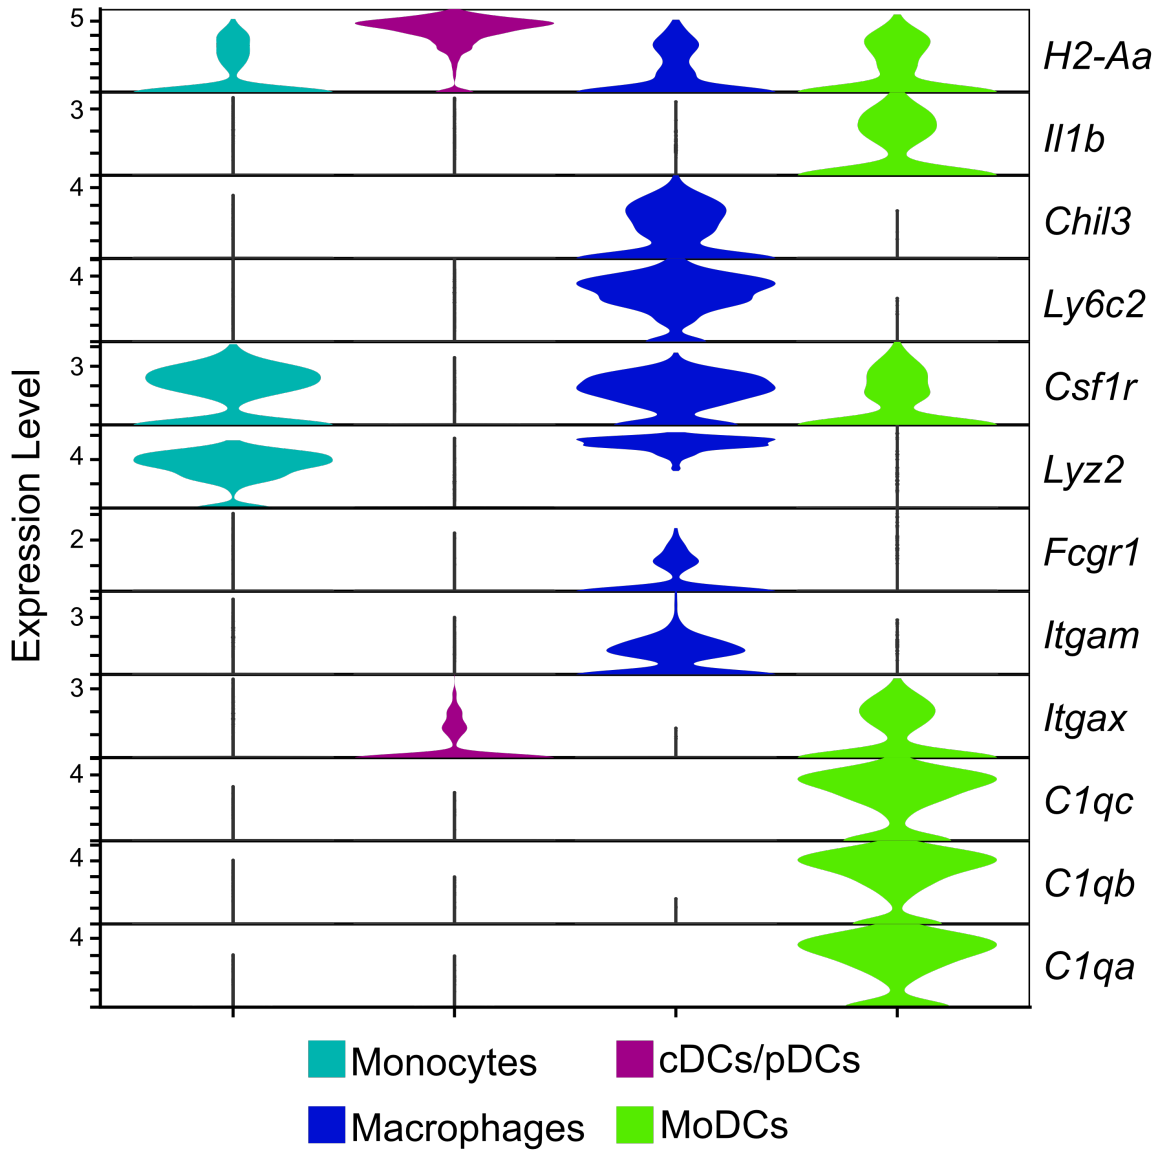

**Supplemental Figure 12:** Expression of selected genes to identify myeloid cell clusters.

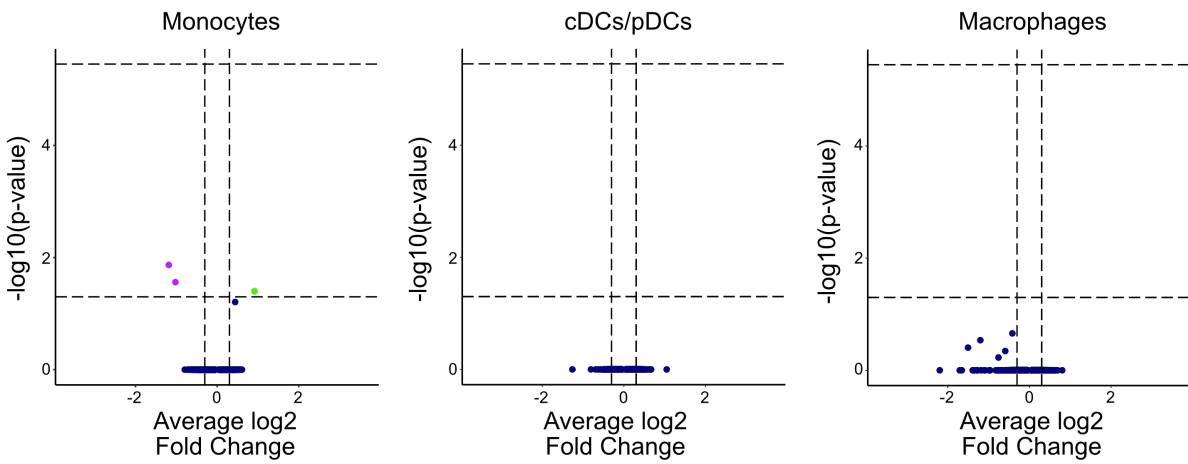

**Supplemental Figure 13:** Volcano plot identifying differentially expressed genes in the monocyte, cDC/pDC, and macrophage clusters between *B6.SLE123+2HOBA* and *B6.SLE123* mice.

|                               | SLE Median [IQR]<br>or # (%)<br>(N = 11) | Control Median [IQR]<br>or # (%)<br>(N = 10) |
|-------------------------------|------------------------------------------|----------------------------------------------|
| <b>Demographics</b>           |                                          |                                              |
| Age, years                    | 39 [27, 54]                              | 34.5 [31, 64]                                |
| Race, # Caucasian             | 6 (55)                                   | 6 (60)                                       |
| Ethnicity, # Hispanic         | 3 (27)                                   | 0 (0)                                        |
| Sex, # female                 | 10 (91)                                  | 7 (70)                                       |
| Blood Pressure (Systolic)     | 123.5 [108-150]                          | 129 [118-137]                                |
| Blood Pressure (Diastolic)    | 75 [51-93]                               | 79 [63-89]                                   |
| BMI                           | 24.5 [17-40.2]                           | 25.4 [22.2-36.7]                             |
| Creatinine                    | 0.84 [0.76-0.87]                         | N/A                                          |
| <b>SLE Manifestation</b>      |                                          |                                              |
| Mucocutaneous, # ever         | 9 (82)                                   | N/A                                          |
| Musculoskeletal, # ever       | 7 (64)                                   | N/A                                          |
| Serositis, # ever             | 8 (72)                                   | N/A                                          |
| Hematologic, # ever           | 6 (55)                                   | N/A                                          |
| Renal, # ever                 | 6 (55)                                   | N/A                                          |
| Anti-dsDNA positivity, #      | 6 (60)                                   | N/A                                          |
| Low complement, # ever        | 6 (55)                                   | N/A                                          |
| SLEDAI, score                 | 2 [2, 4]                                 | N/A                                          |
| SLICC, score                  | 1 [0, 1]                                 | N/A                                          |
| Hypertension                  | 2 (18)                                   | 0 (0)                                        |
| <b>Current medication use</b> |                                          |                                              |
| Hydroxychloroquine, #         | 10 (91)                                  | N/A                                          |
| Mycophenolate, #              | 6 (55)                                   | N/A                                          |
| Corticosteroids, #            | 5 (45)                                   | N/A                                          |
| ACE Inhibitors                | 7 (64)                                   | 0 (0)                                        |

**Supplementary Table 1: Clinical features of SLE patients and controls studied for with flow cytometry.** Data on musculoskeletal involvement and anti-dsDNA antibody data unavailable in 1 subject. SLICC data unavailable in 2 subjects

|                               | SLE Median<br>[IQR]<br>or # (%)<br>(N = 6) | Control Median<br>[IQR]<br>or # (%)<br>(N = 4) |
|-------------------------------|--------------------------------------------|------------------------------------------------|
| <b>Demographics</b>           |                                            |                                                |
| Age, years                    | 29.5 [20, 36.75]                           | 36.75 [29, 39]                                 |
| Race, # Caucasian             | 5 (83)                                     | 4 (100)                                        |
| Ethnicity, # Hispanic         | 1 (16.7)                                   | 1 (25)                                         |
| Sex, # female                 | 4 (67)                                     | 4 (100)                                        |
| Blood Pressure<br>(Systolic)  | 115.5 [105.5-<br>127.75]                   | 127.75 [126-129]                               |
| Blood Pressure<br>(Diastolic) | 70.5 [63.5-81.25]                          | 73 [71-81.25]                                  |
| BMI                           | 22.1 [21.8-36.2]                           | 26 [22.8-26.9]                                 |
| Creatinine                    | 0.71 [0.63-0.92]                           | N/A                                            |
| <b>SLE Manifestation</b>      |                                            |                                                |
| Mucocutaneous, #              | 4 (66.7)                                   | N/A                                            |
| Musculoskeletal, #            | 5 (83.3)                                   | N/A                                            |
| Serositis, # ever             | 1 (16.7)                                   | N/A                                            |
| Hematologic, # ever           | 1 (16.7)                                   | N/A                                            |
| Renal, # ever                 | 2 (33.3)                                   | N/A                                            |
| Anti-dsDNA positivity,        | 4 (66.7)                                   | N/A                                            |
| Low complement, #             | 2 (33)                                     | N/A                                            |
| SLEDAI, score                 | 2 [1, 4]                                   | N/A                                            |
| SLICC, score                  | 0 [0, 1]                                   | N/A                                            |
| Hypertension                  | 0 (0)                                      | 0 (0)                                          |
| <b>Current medication</b>     |                                            |                                                |
| Hydroxychloroquine,           | 6 (100)                                    | N/A                                            |
| Mycophenolate, #              | 2 (33.3)                                   | N/A                                            |
| Corticosteroids, #            | 2 (33.3)                                   | N/A                                            |
| ACE Inhibitors                | 1 (16.7)                                   | 0 (0)                                          |

**Supplemental Table 2: Clinical features of SLE patients and controls studies with mass spectrometry.**



|                              | SLE Median [IQR]<br>or # (%)<br>(N = 6) | Control Median<br>[IQR] or # (%)<br>(N = 4) |
|------------------------------|-----------------------------------------|---------------------------------------------|
| <b>Demographics</b>          |                                         |                                             |
| Age, years                   | 46 [44, 50]                             | 50 [36, 50]                                 |
| Race, # Caucasian            | 4 (66.7)                                | 4 (100)                                     |
| Ethnicity, # Hispanic        | 0 (0)                                   | 0 (0)                                       |
| Sex, # female                | 6 (100)                                 | 3 (75)                                      |
| Blood Pressure<br>(Systolic) | 120.5 [111.25-<br>123.75]               | 123.75 [100-125]                            |
| Blood Pressure               | 73 [66.75-74.75]                        | 73 [57-75]                                  |
| BMI                          | 22.1 [21.8-36.2]                        | 27.5 [25.9-30.7]                            |
| Creatinine                   | 0.71 [0.63-0.92]                        | N/A                                         |
| <b>SLE Manifestation</b>     |                                         |                                             |
| Mucocutaneous, #             | 4 (66.7)                                | N/A                                         |
| Musculoskeletal, #           | 5 (83.3)                                | N/A                                         |
| Serositis, # ever            | 1 (16.7)                                | N/A                                         |
| Hematologic, # ever          | 1 (16.7)                                | N/A                                         |
| Renal, # ever                | 2 (33.3)                                | N/A                                         |
| Anti-dsDNA positivity,       | 4 (66.7)                                | N/A                                         |
| Low complement, #            | 2 (33)                                  | N/A                                         |
| SLEDAI, score                | 2 [1, 4]                                | N/A                                         |
| SLICC, score                 | 0 [0, 1]                                | N/A                                         |
| Hypertension                 | 0 (0)                                   | 0 (0)                                       |
| <b>Current medication</b>    |                                         |                                             |
| Hydroxychloroquine,          | 6 (100)                                 | N/A                                         |
| Mycophenolate, #             | 2 (33.3)                                | N/A                                         |
| Corticosteroids, #           | 2 (33.3)                                | N/A                                         |
| ACE Inhibitors               | 1 (16.7)                                | 0 (0)                                       |

**Supplementary Table 3: Clinical features of SLE patients and controls studied with HPLC.**

|                            | SLE Median [IQR]<br>or # (%) (N = 29) |
|----------------------------|---------------------------------------|
| <b>Demographics</b>        |                                       |
| Age, years                 | 48.4 [40.9,58.5]                      |
| Race, # Caucasian          | 21 (72.4)                             |
| Ethnicity, # Hispanic      | 3 (10.3)                              |
| Sex, # female              | 28 (96.6)                             |
| Blood Pressure (Systolic)  | 120 [114-134]                         |
| Blood Pressure (Diastolic) | 76 [70-85]                            |
| BMI                        | 26.7 [22.9-33.8]                      |
| Creatinine                 | 0.82 [0.77-0.91]                      |
| <b>SLE Manifestation</b>   |                                       |
| Mucosal ulcers, #          | 13 (44.8)                             |
| Myositis, #                | 2 (6.9)                               |
| Arthritis, #               | 6 (20.7)                              |
| Proteinuria, #             | 3 (10.3)                              |
| ANA, #                     | 26 (89.7)                             |
| Low complement, #          | 7 (24.1)                              |
| SLEDAI, score              | 4 [2,8]                               |

**Supplementary Table 4: Clinical features of SLE patients and controls studied with anti-isoLG ELISA.**

|                       | Gene Name       | BaseMean | pvalue   | padj     | FoldChange |
|-----------------------|-----------------|----------|----------|----------|------------|
| ENSMUSG00000026399.12 | <i>Cd55</i>     | 8.62E+02 | 7.26E-41 | 4.44E-39 | 3.95E-01   |
| ENSMUSG00000024371.14 | <i>C2</i>       | 3.70E+02 | 8.82E-34 | 3.56E-32 | 2.35E-01   |
| ENSMUSG00000027082.15 | <i>Tfpi</i>     | 1.54E+02 | 7.21E-24 | 1.50E-22 | 3.04E-01   |
| ENSMUSG00000036905.8  | <i>C1qb</i>     | 1.49E+04 | 2.23E-20 | 3.65E-19 | 2.10E-01   |
| ENSMUSG00000036896.5  | <i>C1qc</i>     | 1.54E+04 | 2.58E-20 | 4.19E-19 | 1.97E-01   |
| ENSMUSG00000036887.5  | <i>C1qa</i>     | 1.52E+04 | 6.01E-18 | 8.34E-17 | 2.09E-01   |
| ENSMUSG00000055172.10 | <i>C1ra</i>     | 1.10E+02 | 6.62E-18 | 9.13E-17 | 2.26E-01   |
| ENSMUSG00000022181.16 | <i>C6</i>       | 4.85E+03 | 1.74E-17 | 2.35E-16 | 1.80E-01   |
| ENSMUSG00000044206.3  | <i>Vsig4</i>    | 5.30E+01 | 1.01E-09 | 6.53E-09 | 2.61E-01   |
| ENSMUSG00000021675.4  | <i>F2rl2</i>    | 4.21E+01 | 1.94E-09 | 1.21E-08 | 2.61E-01   |
| ENSMUSG00000037411.10 | <i>Serpine1</i> | 5.67E+01 | 5.94E-07 | 2.70E-06 | 3.54E-01   |
| ENSMUSG00000040552.8  | <i>C3ar1</i>    | 3.32E+01 | 2.06E-06 | 8.68E-06 | 3.71E-01   |
| ENSMUSG00000032679.12 | <i>Cd59a</i>    | 3.61E+01 | 6.91E-04 | 1.90E-03 | 4.89E-01   |
| ENSMUSG00000026874.10 | <i>Hc</i>       | 2.33E+01 | 3.64E-03 | 8.61E-03 | 2.05E+00   |

**Supplementary Table 5: Complement and coagulation genes identified by RNA sequencing.** Fold change is *B6.SLE123* compared to *C57BL6*.

| Target    | Antibody clone | Flourophore           | Source         | Panel     |
|-----------|----------------|-----------------------|----------------|-----------|
| CD44      | IM7            | Phycoerythrin (PE)    | Biolegend      | B cell    |
| CD45      | 30-F11         | FITC                  | Biolegend      | T cell    |
| CD45      | 30-F11         | PE-Cyanain-7 (Cy7)    | Biolegend      | B cell    |
| CD45      | 30-F11         | Pacific Orange        | Thermo Fisher  | Myeloid   |
| CD3       | 17A2           | PE-Cy7                | Biolegend      | T cell    |
| CD4       | RM4-5          | Allophycocyanin (APC) | BD Biosciences | T cell    |
| CD8       | 53-6.7         | Amcyan                | Biolegend      | T cell    |
| CD19      | 1D3            | APC                   | Biolegend      | B cell    |
| CD138     | 281-2          | Amcyan                | BD Biosciences | B cell    |
| F4/80     | T45-2342       | BV510                 | BD Biosciences | Myeloid   |
| MerTK     | 108928         | APC                   | R&D Systems    | Myeloid   |
| CD11b     | M1/70          | AF700                 | Biolegend      | Myeloid   |
| IAb       | AF6-120.1      | PE/Cy7                | Biolegend      | Myeloid   |
| CD11c     | N418           | APC/Cy7               | Biolegend      | Myeloid   |
| Viability |                | Zombie NIR            | Biolegend      | All cells |

**Supplementary Table 6: Antibodies and fluorophore tags used for flow cytometry.**
